# Supplementary material for: Ultra-Deep Bisulfite Sequencing to Detect Specific DNA Methylation Patterns of Minor Cell Types in Heterogeneous Cell Populations: An Example of the Pituitary Tissue
Source: PubMed Central journal article supplement (PMC4709138; doi:10.1371/journal.pone.0146498), 2016-01-11
Supplement: pone.0146498.s004.pdf [file pone.0146498.s004.pdf]

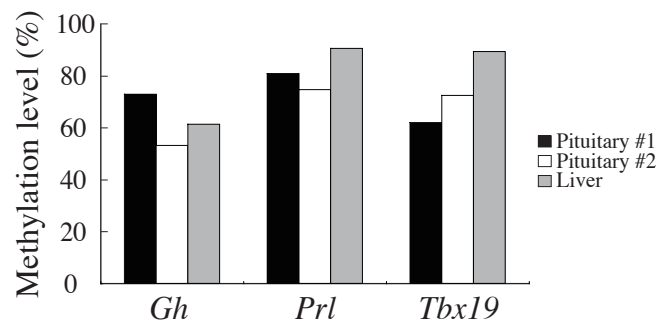

S4 Fig
