# Supplementary material for: Ultra-Deep Bisulfite Sequencing to Detect Specific DNA Methylation Patterns of Minor Cell Types in Heterogeneous Cell Populations: An Example of the Pituitary Tissue
Source: PubMed Central journal article supplement (PMC4709138; doi:10.1371/journal.pone.0146498), 2016-01-11
Supplement: pone.0146498.s005.pdf [file pone.0146498.s005.pdf]

S1 Table. PCR primers.

| Bisulfite PCR primers |                               |                               |           |                               |
|-----------------------|-------------------------------|-------------------------------|-----------|-------------------------------|
|                       | Forward primer (5' -3')       | Reverse primer (5' -3')       | Size (bp) | From transcription start site |
| <i>Acvr2a</i>         | AATATTGTTGGATATTGAAGTTGAAG    | TCTAAAAACCTCCATAAAATTTTCTAA   | 400       | 0.5 kbp downstream            |
| <i>Acvr2b</i>         | GGTGAGGTAGAGAGGGATTGG         | TTCCTTTTATTAACATACCTACCAACA   | 458       | 1.5 kbp downstream            |
| <i>Avp</i>            | GATTTGGGTTTAGGGTTGGATTA       | AAAATCCTCCATCAAAACTACCC       | 395       | 0.5 kbp downstream            |
| <i>Cartpt</i>         | TGGTGTGTTGTTTTGTTAGGTGT       | CAAATACTCACCTCCAACCCTTAT      | 473       | 0.5 kbp downstream            |
| <i>Cd34</i>           | ATAGGGGTTTTGTAAAGGGGAAA       | CCCCTCTCCAACCTACAAACTA        | 405       | 1.0 kbp upstream              |
| <i>Cd34_2</i>         | GAGAGTTGATTGAGGTTTAGATTTT     | CCACAAAAACCCCTTCTACC          | 455       | 2.0 kbp downstream            |
| <i>Crhr2</i>          | TGAGGTTATGAGGTTGGGTTTT        | TCCTAACTCCTCCCCCTAACA         | 319       | 3.0 kbp upstream              |
| <i>Crhr2_2</i>        | GTGGGTTTAGGGTGGTTAAATGT       | TCATCCCTACCCCTAACTTCTA        | 432       | 0.5 kbp upstream              |
| <i>Egr1</i>           | GGAGAGGGGATTTTAGAGGGTA        | ACCTACTTCTCCTCCATCTACCA       | 357       | 1.0 kbp upstream              |
| <i>Esr2</i>           | GTTGGGGATTGGGTGATTA           | CAAAAACCTCCCCTTCTTTTA         | 468       | 0.5 kbp upstream              |
| <i>Esr2_2</i>         | GGAATAGAATTATTTTGGGAAGAGT     | CTCCTCTTCTAAAAACCCACAAAA      | 425       | 0.5 kbp downstream            |
| <i>Gata2</i>          | TTTGATTGTGGGAGAGGTTGT         | CAAAATCCCTAAACCAAAAAACA       | 428       | 1.5 kbp upstream              |
| <i>Gata2_2</i>        | GGGGTGAGGGAGGTTATAGAGT        | AAAATCCCCTCCAACCTTATC         | 467       | 1.0 kbp downstream            |
| <i>Gfra2</i>          | GTATTTTTATGTTGGGTGGGGTAT      | AACTCCAATCCCCAAACCTT          | 441       | 2.0 kbp upstream              |
| <i>Gh1</i>            | ATTAGTGTAGGGAGGAGTAAAGGTGTAA  | ATCCACAAATCCCTAAATAATCTAAAAA  | 492       | 0.5 kbp upstream              |
| <i>Gh1_2</i>          | TTTTTGATGGGGATAGGGTTATAG      | CTCCCTACACTAATACCCTCCAAC      | 351       | 1.0 kbp upstream              |
| <i>Ghr</i>            | TGATTGGGAGTGTGATGTTTTAAT      | CCAAACTCCTATTCCTAAATCCT       | 384       | 1.0 kbp upstream              |
| <i>Ghr_2</i>          | TTTTTGTAAGTATGGTGTGAAA        | AAAAACCATCCCTACTCCCTTAAT      | 393       | 2.0 kbp upstream              |
| <i>Gli1</i>           | TTTTGTTTTAGATTTAAAGAGGGTGT    | ATTTTTCTACCAACCTCATCCTCTAA    | 375       | 3.5 kbp upstream              |
| <i>Gnrhr</i>          | GAAAGAAGTATTGAAAGTTGTGGAGA    | AAAACCAAAACCATCTACTAAAACTACAA | 453       | 0.2 kbp upstream              |
| <i>Lhb</i>            | GATGAGTAGAGGGGGATTGTAGA       | CCCTCCTACTAACTATCCACAACC      | 462       | 0.2 kbp upstream              |
| <i>Lhb_2</i>          | GGGATTGAATTTGGAATTTGTATT      | TCTACAAATCCCCCTCTACTCATC      | 395       | 0.5 kbp upstream              |
| <i>Lhx4</i>           | AGGGTATTGTGTTGGTGGAGTTG       | AAATACATCAACACACTATTCAAAAA    | 486       | 1.5 kbp upstream              |
| <i>Math3</i>          | ATTAGTTGTTTATGGGATGTTGGTAG    | AACAAAACCCAAATATAATTCCTAACC   | 309       | 8.0 kbp downstream            |
| <i>Math3_2</i>        | GGGAAAGGGAGGAGTTAGATTG        | CAAATCTCCCTAACCATCCAAA        | 365       | 1st exon                      |
| <i>Myt1l</i>          | AATGGATTTTATGGATGGGTTG        | TACCTTTTCCAACCACACAAAC        | 435       | 1st exon                      |
| <i>Pit1</i>           | TTTGGGTAAGAAGGAAGATAGTTTAGA   | CTAACCATCTCTAAACCCAACCA       | 432       | 1st exon                      |
| <i>Pit1_2</i>         | AAAAATTGATTTAAAATTTGATAGGGAGT | TCTAAAATCTCAATCTTAAACATAATTCC | 462       | 2.5 kbp upstream              |
| <i>Prl</i>            | TGTAGTTTTGAAATTTTGGTTAGAAT    | AAACTAATCTCCAAATCTCACTTCATT   | 450       | 0.2 kbp upstream              |
| <i>Prl_2</i>          | TATGGAAGAGGTTTGGGAATTAGATA    | TCTAACCAAAAAATTTCAAAACTACAAAA | 397       | 0.5 kbp downstream            |
| <i>Rara</i>           | GTTTTGGTAGGGGTGGGATT          | TCTTCCCCTCACTTCCCTAA          | 349       | 0.5 kbp downstream            |
| <i>Rxr</i>            | TGGTGAGAGAGGGTAAGTGA          | TTCACACCCAAAACCCAACT          | 386       | 1.5 kbp downstream            |
| <i>Shh</i>            | GGTTAGGTAGGGTTAAGGGAGA        | ACACACACCACCCCATTAAT          | 439       | 1.5 kbp upstream              |
| <i>Tbx19</i>          | TTAGGTGGGAGAGAGTTTGTTTTT      | TCCTCCTAATCTCTAACCCCTTAAACA   | 427       | 0.5 kbp upstream              |
| <i>Trhr</i>           | AAGATGGTGATTATTTGGTATTTTAGG   | TTTCCATTAAACACTCTCAAAACAA     | 447       | 0.5 kbp upstream              |
| <i>Wnt3a</i>          | AGAGGGAGAAAAGGAAGGTATTAG      | CCAAAACTAAACTATAACCAAAATAACA  | 463       | 0.5 kbp upstream              |
| <i>Wnt3a_2</i>        | GGAGAGGTAAAGAGGGAGAGAAAAG     | CTCCCATCTAAATCTCCTCCAAC       | 394       | 0.5 kbp downstream            |
| <i>Sall4</i>          | ATTGAGTTTGAAGAATGGTGAATGT     | CCAATTACTCCAACAATACCCACTA     | 406       | 0.5 kbp upstream              |
| <i>Meg3</i>           | TTTTTATAGGGAGATGGTTTGTGTT     | ACCCCAAAACAAAATAACTAATACCC    | 304       | 0.5 kbp upstream              |
| <i>Peg10</i>          | TTTGAGAAATTAAGTTTTTAGGGTTT    | CAATAAAATACCCATCAATTAACAACA   | 311       | 0.5 kbp downstream            |
| RT-PCR primers        |                               |                               |           |                               |
|                       | Forward primer (5' -3')       | Reverse primer (5' -3')       | Size (bp) |                               |
| <i>Gh1</i>            | CAAAAAGGGACCAATTCAGA          | CATTGGCAAATAGGCTGGAC          | 193       |                               |
| <i>Pit1</i>           | TTCGGCTGACACCTTTATACCT        | ACTCCATAGGTCGATGACTGGT        | 186       |                               |
| <i>Lhb</i>            | GACTGCTGTTGTGGCTGCT           | AAAGCTCAGCTCTCGGTAGGT         | 236       |                               |
| <i>Tbx19</i>          | GGCAGAGATTCAAGGAAGTCAC        | GCTTCACTTTGCTGAAGGAGAT        | 288       |                               |
| <i>Prl</i>            | TAAAGCCAATATCTGGGGAAGA        | TCCGAAGAGAGGTTATGGATGT        | 277       |                               |
| <i>Gapdh</i>          | ACCACAGTCCATGCCATCAC          | TCCACCACCCTGTTGCTGTA          | 452       |                               |
