# Supplementary material for: Ultra-Deep Bisulfite Sequencing to Detect Specific DNA Methylation Patterns of Minor Cell Types in Heterogeneous Cell Populations: An Example of the Pituitary Tissue
Source: PubMed Central journal article supplement (PMC4709138; doi:10.1371/journal.pone.0146498), 2016-01-11
Supplement: pone.0146498.s007.pdf [file pone.0146498.s007.pdf]

S3 Table. Summary of Hypo-allele analysis of the five T-DMRs of pituitary cell type-restricted genes shown in Fig. 4.

|              |        | Pituitary #1    |                 | Pituitary #2    |                 | Liver           |                 |
|--------------|--------|-----------------|-----------------|-----------------|-----------------|-----------------|-----------------|
|              |        | Number of reads | Hypo-allele (%) | Number of reads | Hypo-allele (%) | Number of reads | Hypo-allele (%) |
| <i>Ghl</i>   | Exp. 1 | 2,629           | 17.5            | 3,294           | 17.3            | 1,597           | 5.3             |
|              | Exp. 2 | 3,304           | 12.8            | 12,505          | 12.1            | 3,901           | 7.4             |
| <i>Prl</i>   | Exp. 1 | 1,107           | 22.7            | 721             | 34.8            | 172             | 7.0             |
|              | Exp. 2 | 5,338           | 25.8            | 1,564           | 47.1            | 4,892           | 4.4             |
| <i>Lhb</i>   | Exp. 1 | 1,335           | 15.7            | 2,437           | 41.2            | 1,133           | 0               |
|              | Exp. 2 | 1,692           | 9.3             | 8,003           | 29.5            | 2,672           | 0               |
| <i>Tbx19</i> | Exp. 1 | 1,024           | 11.6            | 1,361           | 13.3            | 1,131           | 0               |
|              | Exp. 2 | 820             | 23.2            | 3,068           | 13.2            | 1,493           | 0               |
| <i>Pit1</i>  | Exp. 1 | 1,978           | 63.1            | 1,875           | 51.5            | 1,460           | 6.0             |
|              | Exp. 2 | 1,968           | 59.6            | 3,984           | 82.2            | 2,321           | 0               |

The numbers of reads and Hypo-allele ratios of two pituitary (#1 and #2) and one liver sample from two independent experiments (Exps. 1 and 2) are described for the five genes.
